# Supplementary material
Source: PubMed Central journal article supplement (PMC5303568)
Supplement: NIHMS802549-supplement-Supplementary__Attachment_Side_Effects_Form.pdf [file NIHMS802549-supplement-Supplementary__Attachment_Side_Effects_Form.pdf]

# SIDE EFFECTS

| SLOS Simvastatin Study                                                                                                                                                                                                      |                                                                                                                                                                                                                          |                                                                                                     |
|-----------------------------------------------------------------------------------------------------------------------------------------------------------------------------------------------------------------------------|--------------------------------------------------------------------------------------------------------------------------------------------------------------------------------------------------------------------------|-----------------------------------------------------------------------------------------------------|
| <input type="checkbox"/> NIH<br><input type="checkbox"/> KKI                                                                                                                                                                | <b>Subject Number</b> <input type="text"/> <input type="text"/> <input type="text"/> <input type="text"/> <input type="text"/><br><b>Subject Initials</b> <input type="text"/> <input type="text"/> <input type="text"/> | <b>Study Month:</b> (circle one):<br>0, 0.5, 1, 3, 6, 9, 12, 14, 15, 17, 20, 23, 26<br>Other: _____ |
| <b>Date Assessment Completed:</b> <u>   </u> / <u>   </u> / <u>   </u> <div style="font-size: small; margin-left: 10px;">                         m    m    /    d    d    /    y    y    y    y                     </div> |                                                                                                                                                                                                                          | <b>Staff ID:</b> <input type="text"/> <input type="text"/> <input type="text"/>                     |
| <b>Was any data collected for this form?</b> (Circle one) <b>Yes</b> <b>No</b> (If <b>YES</b> , continue.)                                                                                                                  |                                                                                                                                                                                                                          |                                                                                                     |

**Your Initials:**         
 **Relationship to Child:** \_\_\_\_\_

|                     |                   |
|---------------------|-------------------|
| 1= Mother           | 5= Father         |
| 2= Grandmother      | 6= Grandfather    |
| 3= Guardian, female | 7= Guardian, male |
| 4= Other female     | 8= Other male     |

Directions: For each behavior, please check the box corresponding to the degree of the behavior as observed over the *past week*. If absent, or if you have not seen the problem, check the box marked absent.

**Mild** = causes little or no interference in every day life (e.g., behavior occurs occasionally and is low in intensity)  
**Moderate** = causes some interference in every day life (e.g., behavior occurs occasionally and is high in intensity or behavior occurs frequently and is low in intensity)  
**Severe** = causes clear and substantial interference in every day life (e.g. behavior occurs frequently and is high in intensity)

\*\*If the behavior was present prior to starting this protocol, indicate the degree of this behavior by writing mild, moderate or severe in this column , using the above definitions.

| BEHAVIOR                                                         | Absent | Present prior** | Mild | Moderate | Severe | Office Use |
|------------------------------------------------------------------|--------|-----------------|------|----------|--------|------------|
| 1. Irritable, easily annoyed, touchy (emotionally over-reactive) |        |                 |      |          |        |            |
| 2. Crabby, whiny                                                 |        |                 |      |          |        |            |
| 3. Tearful, prone to crying                                      |        |                 |      |          |        |            |
| 4. Sad, unhappy, depressed                                       |        |                 |      |          |        |            |
| 5. Social withdrawal, talks or interacts little                  |        |                 |      |          |        |            |
| 6. Staring, daydreaming                                          |        |                 |      |          |        |            |
| 7. Dull, not alert                                               |        |                 |      |          |        |            |
| 8. Drowsy, sleepy                                                |        |                 |      |          |        |            |
| 9. Insomnia                                                      |        |                 |      |          |        |            |
| 10. Eating less                                                  |        |                 |      |          |        |            |
| 11. Eating more                                                  |        |                 |      |          |        |            |
| 12. Diarrhea, loose bowel movements                              |        |                 |      |          |        |            |
| 13. Change in urine color                                        |        |                 |      |          |        |            |
| 14. Change in skin or whites of eye color                        |        |                 |      |          |        |            |
| 15. Dizzy, balance unstable                                      |        |                 |      |          |        |            |
| 16. Headaches                                                    |        |                 |      |          |        |            |
| 17. Weakness                                                     |        |                 |      |          |        |            |
| 18. Stomachaches, nausea, vomiting                               |        |                 |      |          |        |            |

# SIDE EFFECTS

| SLOS Simvastatin Study |   |   |   |                         |   |   |   |                                   |   |   |   |
|------------------------|---|---|---|-------------------------|---|---|---|-----------------------------------|---|---|---|
| <b>Subject Number</b>  |   |   |   | <b>Subject Initials</b> |   |   |   | <b>DATE ASSESSMENT COMPLETED:</b> |   |   |   |
| □                      | □ | □ | □ | □                       | □ | □ | □ | □                                 | □ | □ | □ |
| m                      |   | m |   | d                       |   | d |   | y                                 |   | y |   |

| BEHAVIOR                                                                                                                                                 | Absent | Present prior** | Mild | Moderate | Severe | Office Use |
|----------------------------------------------------------------------------------------------------------------------------------------------------------|--------|-----------------|------|----------|--------|------------|
| 18. Anxiety, fear, nervousness                                                                                                                           |        |                 |      |          |        |            |
| 19. Restless, high activity level                                                                                                                        |        |                 |      |          |        |            |
| 20. Easily excited                                                                                                                                       |        |                 |      |          |        |            |
| 21. Excessive talking                                                                                                                                    |        |                 |      |          |        |            |
| 22. Excessively happy, silly                                                                                                                             |        |                 |      |          |        |            |
| 23. Bizarre behavior                                                                                                                                     |        |                 |      |          |        |            |
| 24. Weakness                                                                                                                                             |        |                 |      |          |        |            |
| 25. Muscle cramping                                                                                                                                      |        |                 |      |          |        |            |
| 26. Gets stuck on repetitive activities                                                                                                                  |        |                 |      |          |        |            |
| 27. Stereotypic movements (deliberate, repetitive movements with no apparent function: e.g., rocks body back and forth; shakes hand(s) in front of eyes) |        |                 |      |          |        |            |
| 28. Self injury (deliberately hurts self – e.g., bites, hits, scratches, or otherwise injures self)*                                                     |        |                 |      |          |        |            |
| 29. Repetitive picking at hair, skin, fingernails or biting fingernails*                                                                                 |        |                 |      |          |        |            |
| 30. Other (specify)<br>_____<br>_____                                                                                                                    |        |                 |      |          |        |            |
| 31. Other (specify)<br>_____<br>_____                                                                                                                    |        |                 |      |          |        |            |

\* If picking or nail biting causes self-injury, rate the degree of self-injury on item 28. Also rate the picking or nail biting on item 29.

Do you have any additional comments about possible side effects? (Since last form)

**For Clinician:**

|                                                          | YES | NO |
|----------------------------------------------------------|-----|----|
| 32. Current health complaints                            | 1   | 2  |
| 33. Recent injuries, illness requiring medical attention | 1   | 2  |
| 34. Recent illness                                       | 1   | 2  |
| 35. Concurrent medication                                | 1   | 2  |

If **yes**, complete Concomitant Medication Form

**Review each item, score 0 for absent, 1 for mild, 2 for moderate, and 3 for severe. Enter a final score in the shaded column.**
