# Supplementary material
Source: PubMed Central journal article supplement (PMC5303568)
Supplement: NIHMS802549-supplement-Supplementary__Figures_and_Tables.pdf [file NIHMS802549-supplement-Supplementary__Figures_and_Tables.pdf]

# Supplemental Figure 1

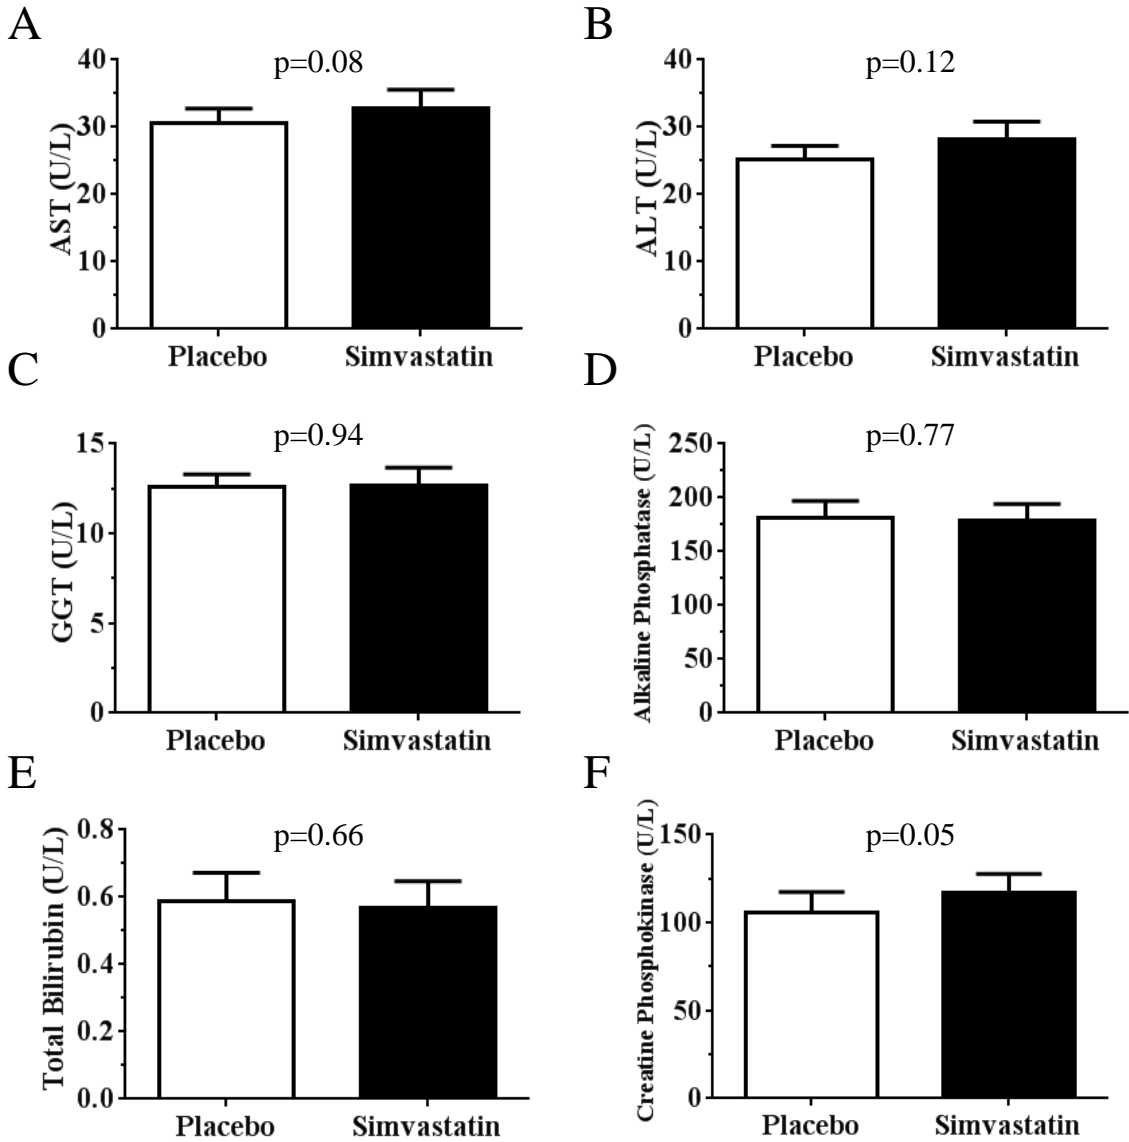

# Supplemental Figure 2

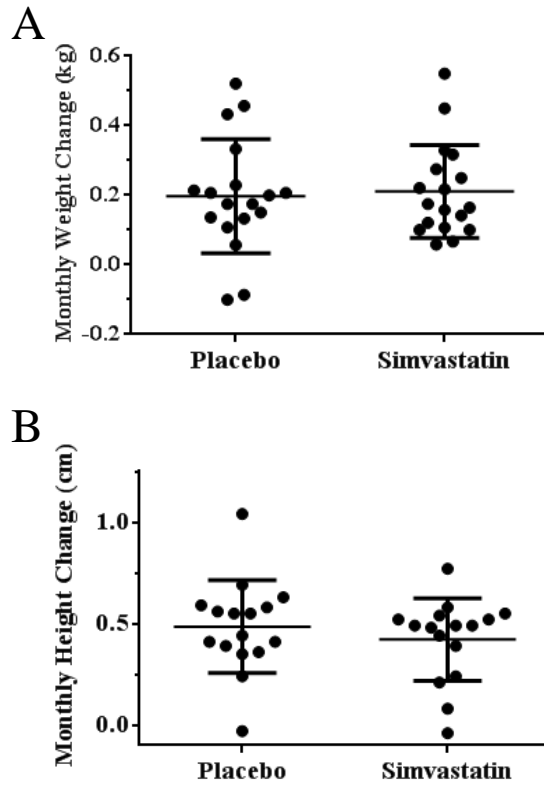

**Supplemental Table 1: Randomization Demographics**

|                                | <b>Cohort</b>               |                               |                    |
|--------------------------------|-----------------------------|-------------------------------|--------------------|
|                                | <b><u>Placebo First</u></b> | <b><u>Simvastin First</u></b> |                    |
| Number of subjects             | 12                          | 10                            |                    |
| Gender (Male/Female)           | 7/5                         | 6/4                           | p=1.0 <sup>b</sup> |
| Age (years)                    | 8.6 ± 1.3 <sup>a</sup>      | 7.8 ± 0.7                     | p=0.60             |
| Severity Score                 | 13.1 ± 2.0                  | 13.4 ± 2.2                    | p=0.91             |
| Residual cholesterol synthesis | 0.41 ± 0.06                 | 0.33 ± 0.04                   | p=0.31             |
| DHC/Total Sterol Ratio         |                             |                               |                    |
| Plasma (%)                     | 9.1 ± 1.9                   | 9.1 ± 2.9                     | p=0.99             |
| CSF (%)                        | 7.3 ± 1.2                   | 5.9 ± 1.4                     | p=0.47             |

<sup>a</sup>Mean ± SEM, unpaired t-test

<sup>b</sup>Fischer's exact test

## Supplemental Table 2. Adverse Events

| <u>Subject</u> | <u>Phase</u> | <u>Issue</u>                                                               |
|----------------|--------------|----------------------------------------------------------------------------|
| S03            | Simv         | Urinary tract infection                                                    |
|                | Simv         | Waking up attributed to evening dose and abdominal gas                     |
|                | Placebo      | Episode of limping                                                         |
|                | OLE          | H1N1 infection                                                             |
|                | OLE          | Sun sensitivity                                                            |
| S04            | Placebo      | Muscle pain and increasing CPK levels*                                     |
| S05            | Baseline     | Gastroenteritis and leg pain after lumbar puncture*                        |
| S06            | Simv         | Post spinal tap headache*                                                  |
|                | OLE          | Transient elevation of total bilirubin                                     |
| S08            | Placebo      | Diagnosed with glaucoma*                                                   |
|                | Simv         | Shingles                                                                   |
|                | Simv         | Dengue fever                                                               |
| S10            | Placebo      | Flushing episode related to CRH infusion                                   |
|                | OLE          | Increased aggression and self-injurious behavior                           |
| S11            | Placebo      | Periorbital cellulitis*                                                    |
|                | Simv         | Diarrhea                                                                   |
| S12            | Placebo      | Diarrhea                                                                   |
|                | Placebo      | Scarlet fever                                                              |
|                | Placebo      | Episode of jerking and dazed appearance one day after starting this phase. |
|                | OLE          | H1N1 infection                                                             |
|                | OLE          | Two crying episodes and refusal to walk                                    |
| S13            | Placebo      | Emesis two days after starting this phase                                  |
|                | OLE          | Episode of abdominal pain                                                  |
| S16            | Placebo      | Diarrhea                                                                   |
|                | Simv         | Diarrhea                                                                   |
|                | Simv         | Corneal abrasion after ophthalmological evaluation                         |
| S17            | Simv         | Salmonella gastroenteritis                                                 |
| S19            | Simv         | Parvovirus B19 infection                                                   |
| S20            | Simv         | Pneumonia                                                                  |
| S21            | Placebo      | Dx with seizure disorder                                                   |
|                | Simv         | H1N1 infection                                                             |
| S23            | Baseline     | Hematuria                                                                  |
|                | Simv         | Corneal abrasion after ophthalmological evaluation                         |

\*SAE
